# Supplementary material for: A Comparative Study of Morphology, Photosynthetic Physiology, and Proteome between Diploid and Tetraploid Watermelon (Citrullus lanatus L.)
Source: MDPI journal article supplement (doi:10.3390/bioengineering9120746), 2022-12-01
Supplement: s1 [file s1]

Table S1 Primers sequence used for qRT-PCR

| Gene ID   | Forward Primer       | Reverse Primer       |
|-----------|----------------------|----------------------|
| Cla009752 | CGTGAGCTCGAAGTGATCCA | CGTGAGCTCGAAGTGATCCA |
| Cla010223 | CTGTCTTGGCCACTACACGT | TCGAACCGTGGTCCTCAAAG |
| Cla011786 | TGGCTACGGTTCTCGATTCC | AGCGATCTTCAAGCCTCTGC |
| Cla007717 | GGTCAGAGGACCTGCACCTT | ACCATGGATTCTCGCCAGTT |
| Cla008848 | AGAGAGGCCACAGCCTTGAG | CGTCGGCAACACTTCCACTA |
| Cla007792 | CCATGTATGTTGCCATCCAG | GGATAGCATGGGGTAGAGCA |
